# Supplementary material for: Evidence of gas-phase pyranose-to-furanose isomerization in protonated peptidoglycans
Source: Royal Society of Chemistry journal article supplement (doi:10.1039/d1cp03842g), 2021-01-01
Supplement: d1cp03842g1.pdf [file d1cp03842g1.pdf]

**Supplementary Information:**

**Evidence of Gas-phase Pyranose-to-furanose Isomerization in  
Protonated Peptidoglycans**

Shanshan Guan<sup>a,b</sup> and Benjamin J. Bythell<sup>a,b\*</sup>

- a. Department of Chemistry and Biochemistry, Ohio University, 307 The Chemistry Building, Athens, OH 45701.*
- b. Department of Chemistry and Biochemistry, University of Missouri, 1 University Blvd, St. Louis, MO 63121.*

Correspondence E-mail: [bythell@ohio.edu](mailto:bythell@ohio.edu)

**Figure S1**

Hydrogen-deuterium exchange MS/MS spectra: (a) *GlcNac-β-1-Asn*, (b) *GlcNac-β-1-Ser*, and (c) *GalNac-α-1-Ser*.

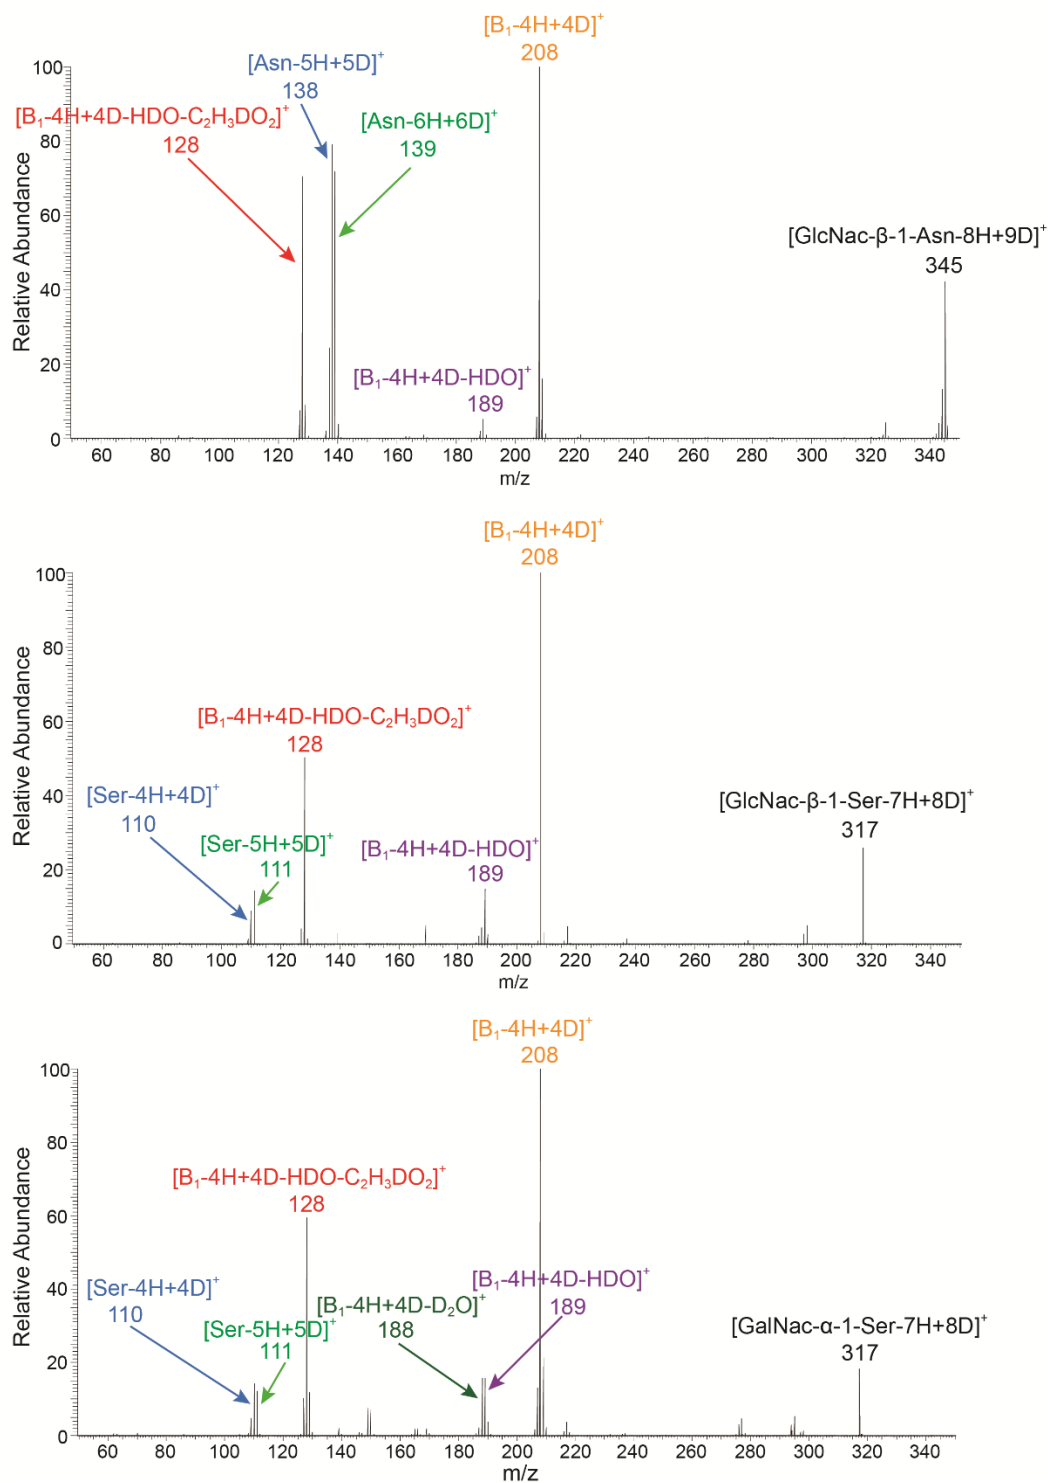

**Figure S2**

Pyranose form glycosidic bond dissociation pathway of  $[\text{GlcNac-}\beta\text{-1-Asn+H}]^+$  calculated at B3LYP/6-31+G(d,p) level of theory, (a) Glycosidic bond cleavage TS (b) formation of the glycopyranosyl oxazolinium B<sub>1</sub> ion TS.

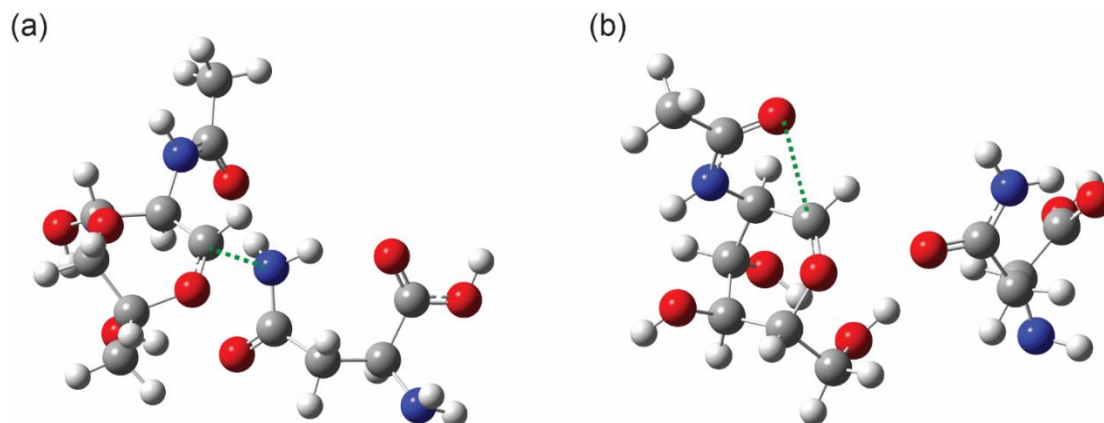

**Figure S3**

Pyranose form glycosidic bond dissociation reaction calculated at B3LYP/6-31+G(d,p) level of theory, (a) [GlcNac- $\beta$ -1-Ser+H]<sup>+</sup> (b) [GalNac- $\alpha$ -1-Ser+H]<sup>+</sup>.

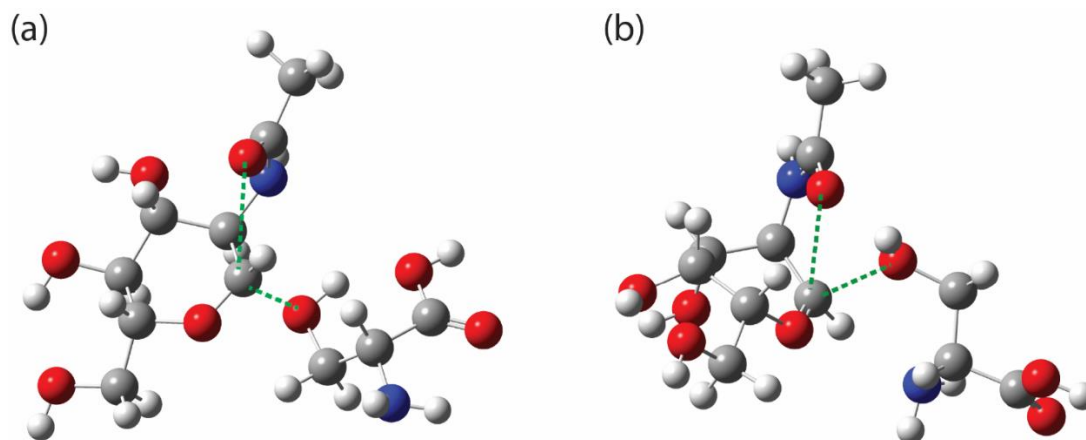

**Figure S4**

Transition state structures of pyranose to furanose isomerization calculated at B3LYP/6-31+G(d,p) level of theory; (a)  $S_N2$  opening of the pyranose ring of [GlcNac- $\beta$ -1-Ser+H] $^+$ , (b)  $S_N2$ -like formation of the furanose [GlcNac- $\beta$ -1-Ser+H] $^+$ , (c)  $S_N2$  opening of the pyranose ring of [GalNac- $\alpha$ -1-Ser+H] $^+$ , (d)  $S_N2$ -like formation of the furanose structured [GalNac- $\alpha$ -1-Ser+H] $^+$ .

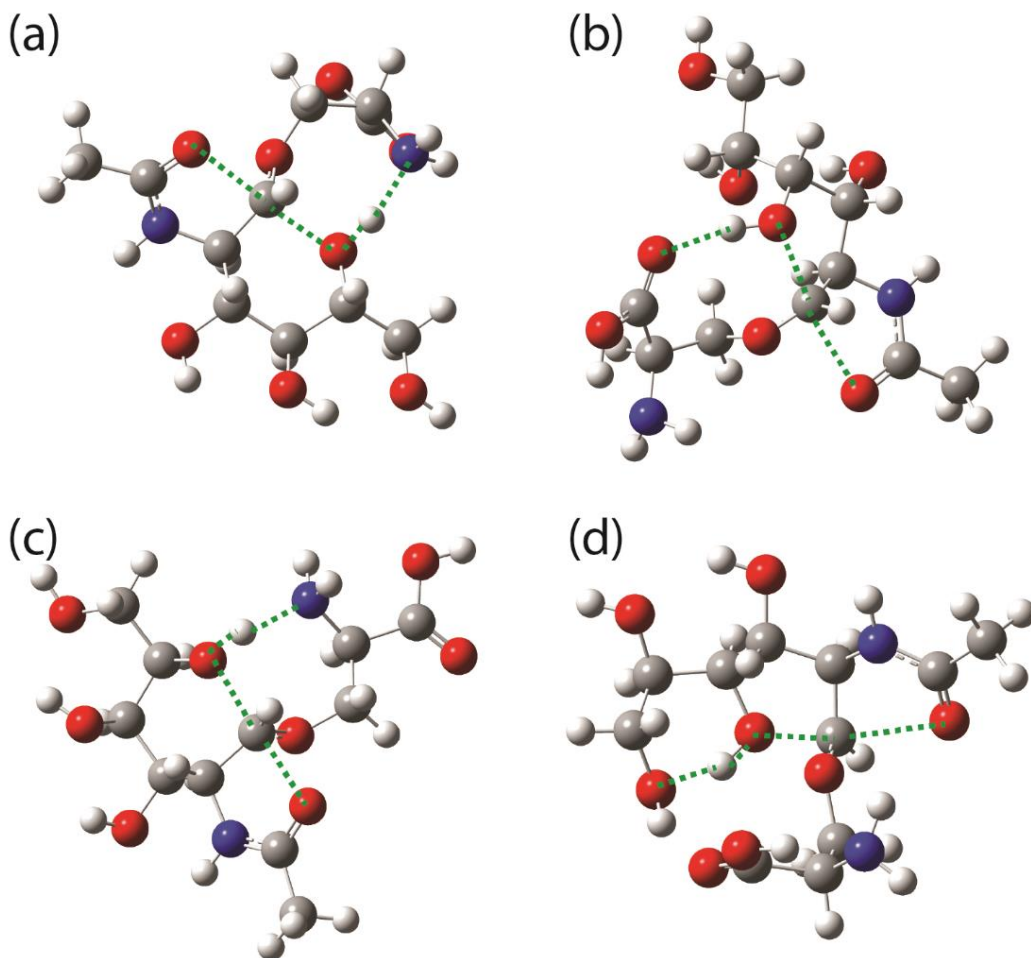

**Figure S5**

Transition structures of glycosidic bond cleavage reactions after pyranose to furanose isomerization calculated at B3LYP/6-31+G(d,p) level of theory; (a) [GlcNac- $\beta$ -1-Asn+H]<sup>+</sup>, (b) [GlcNac- $\beta$ -1-Ser+H]<sup>+</sup>, (c) [GalNac- $\alpha$ -1-Ser+H]<sup>+</sup>.

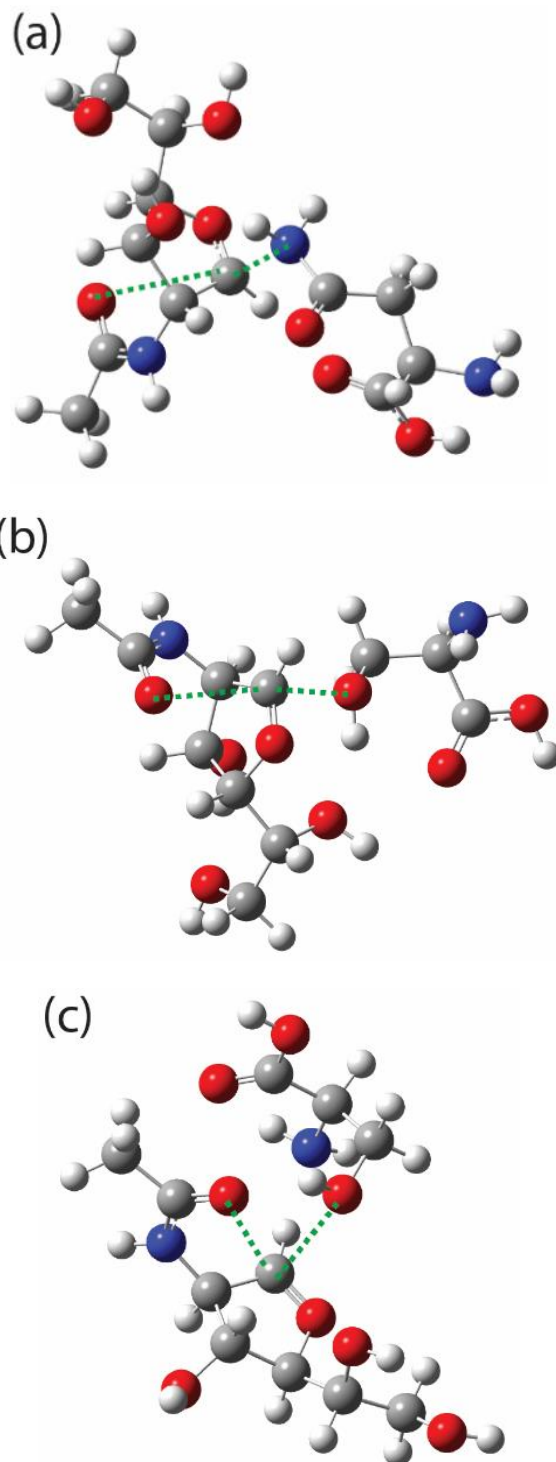

**Figure S6**

RRKM unimolecular rate constants,  $k$  ( $\text{s}^{-1}$ ) calculated for the pyranose glycosidic bond cleavage pathway for  $[\text{GlcNac-}\beta\text{-1-Asn+H}]^+$  at B3LYP/6-31+g(d,p) level of theory.

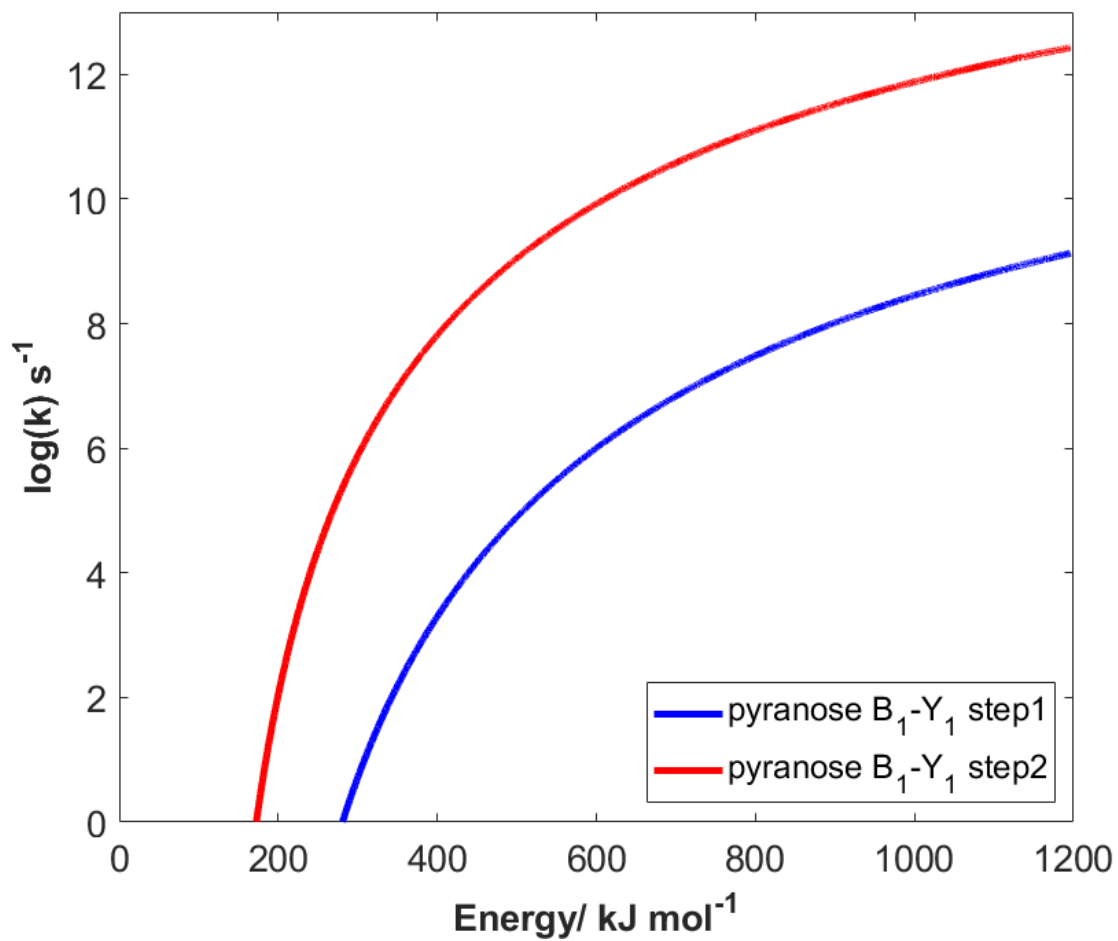

**Figure S7**

RRKM unimolecular rate constants,  $k$  ( $\text{s}^{-1}$ ) calculated for the isomerized furanose glycosidic bond cleavage pathway for  $[\text{GlcNac-}\beta\text{-1-Asn+H}]^+$  at B3LYP/6-31+g(d,p) level of theory.

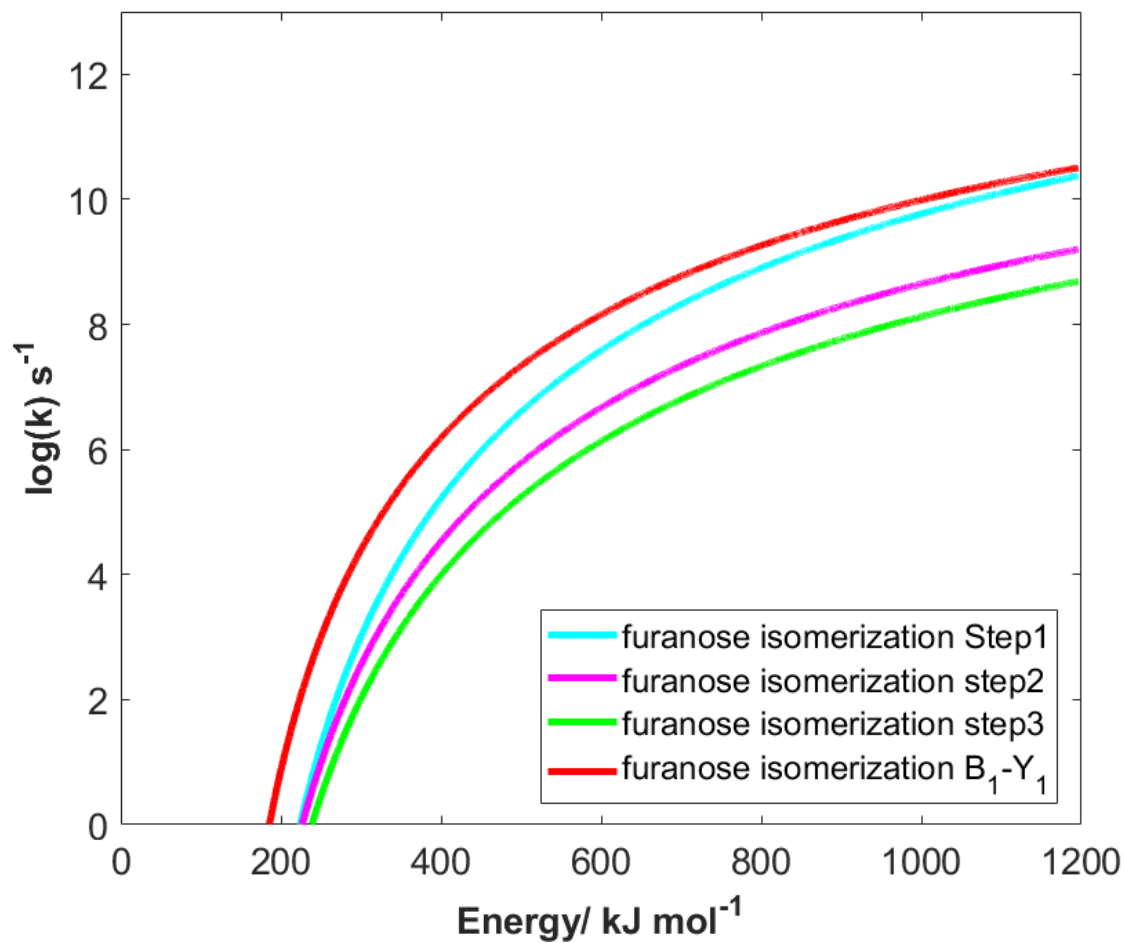



**Figure S8**

RRKM unimolecular rate constants,  $k$  ( $\text{s}^{-1}$ ) calculated for  $[\text{GlcNac-}\beta\text{-1-Ser+H}]^+$  at B3LYP/6-31+g(d,p) level of theory. i.e., the 2 blue lines are the rate-determining steps for the glycosidic bond cleavage reactions.

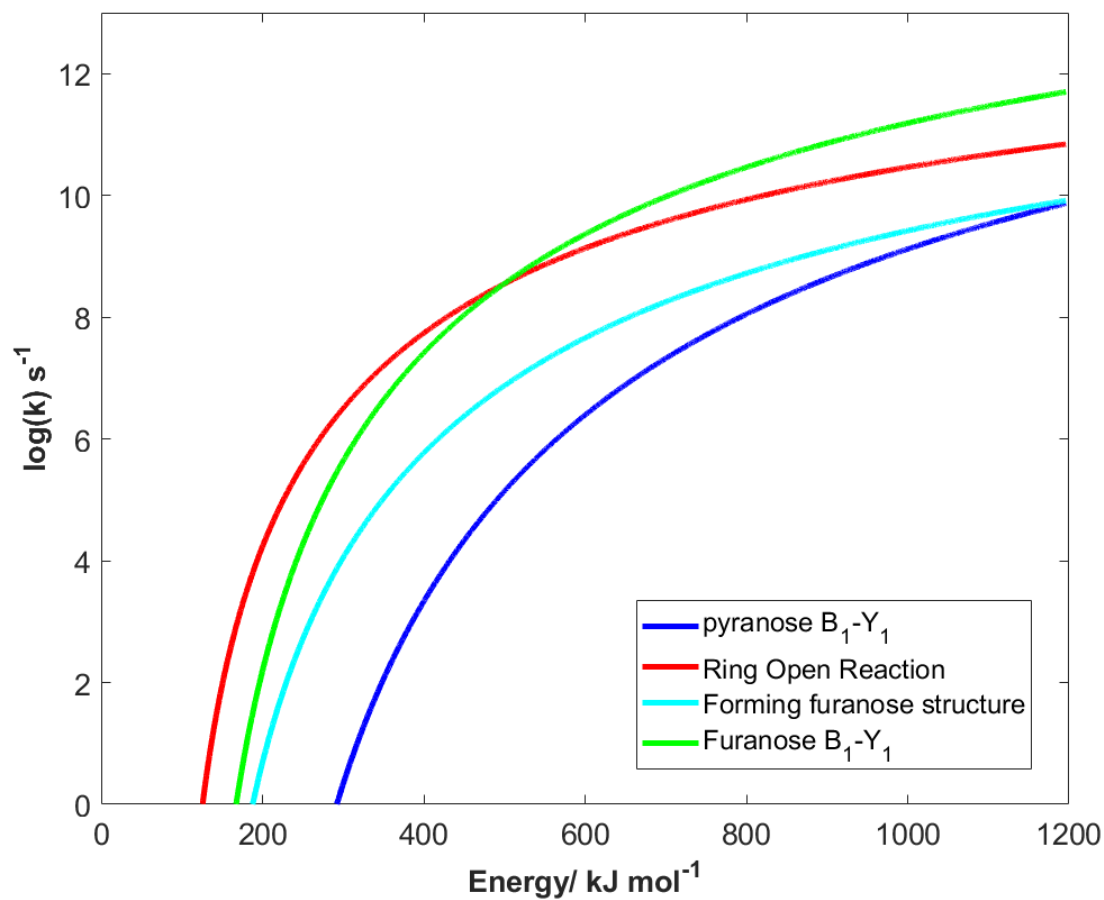

**Figure S9**

RRKM unimolecular rate constants,  $k$  ( $\text{s}^{-1}$ ) calculated for  $[\text{GalNac-}\alpha\text{-1-Ser+H}]^+$  at B3LYP/6-31+g(d,p) level of theory. i.e., the green line is the rate-determining step for the Furanose isomerization then B1-Y1 reaction whereas the dark blue line is for the direct, pyranose dissociation reaction.

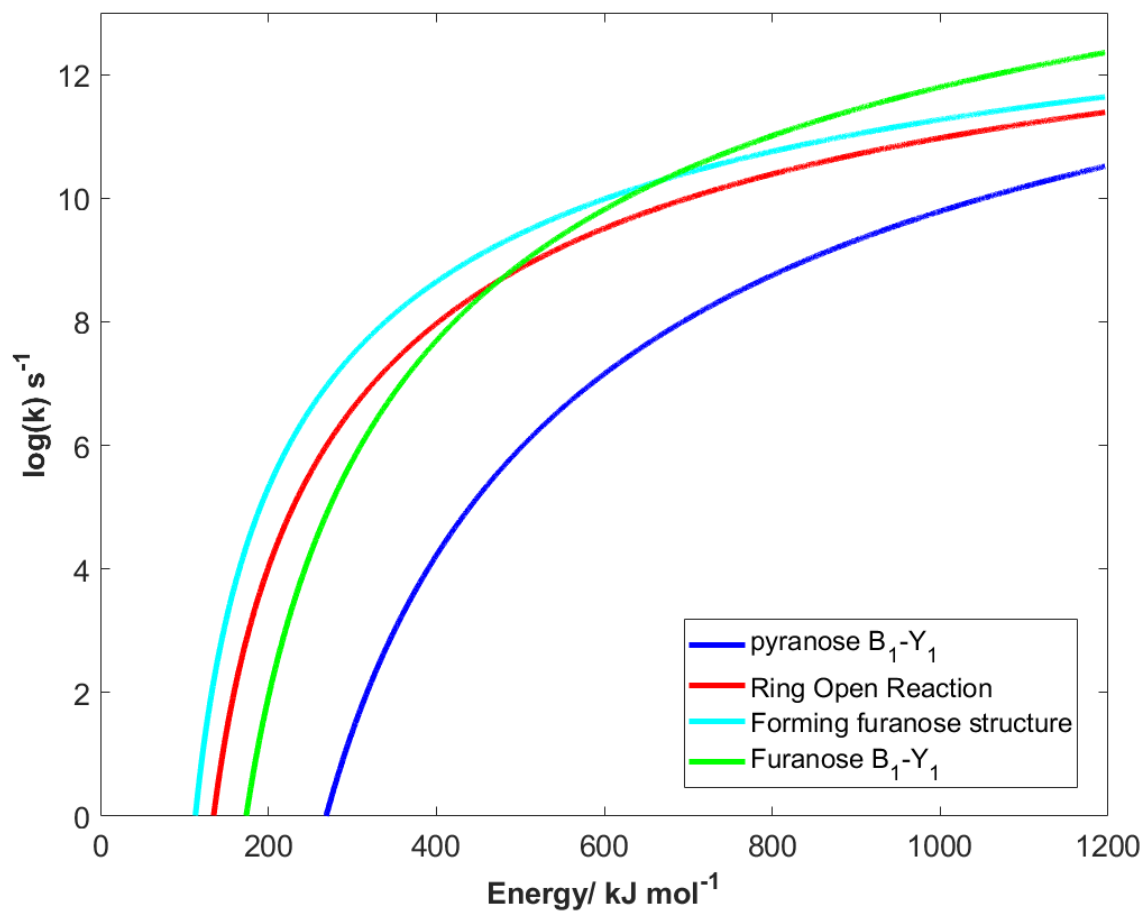

**Figure S10**

*Transition structures of producing  $m/z$  126 ion from the  $\alpha$ -GalNAc-originated bicyclic furanose oxazolinium structured  $B_1$  ion; (a) loss of  $H_2O$ ; (b) loss the  $C_2H_4O_2$ .*

(a)

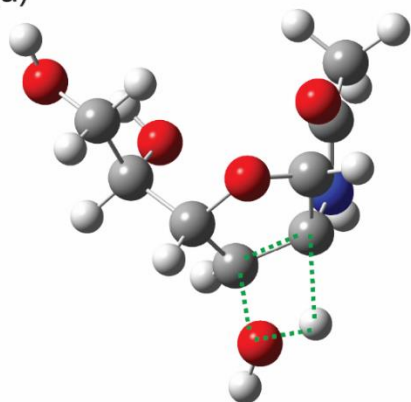

(b)

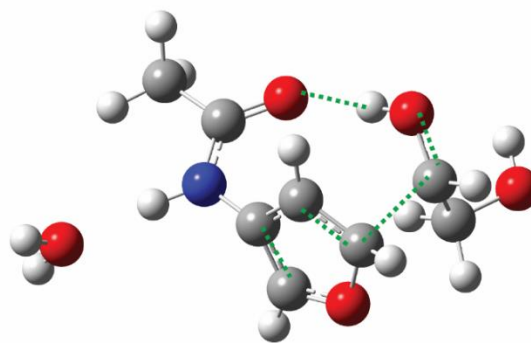

**Scheme S1**

Direct glycosidic bond cleavage reaction of pyranose form [GlcNac- $\beta$ -1-Ser+H]<sup>+</sup> results in a glycopyranosyl oxazolinium structured B<sub>1</sub> ion and neutral serine.

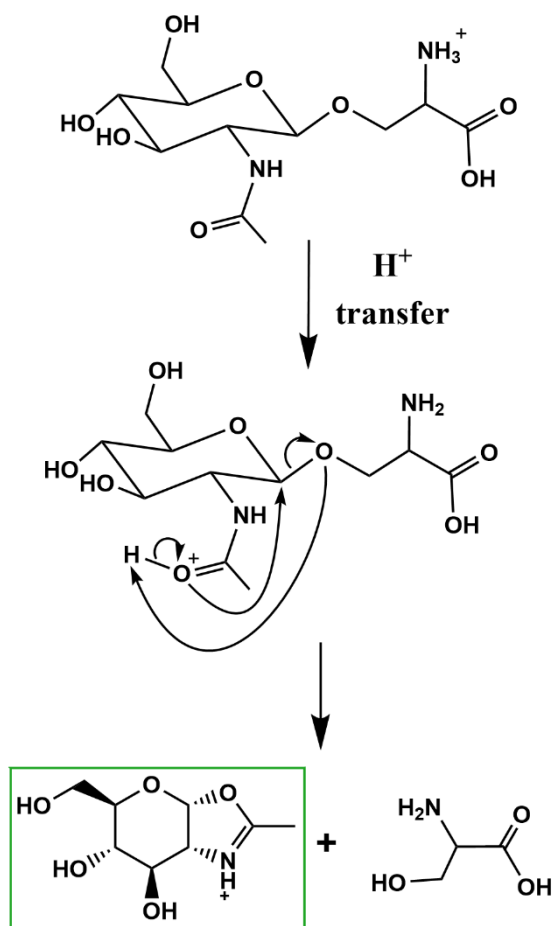

**Scheme S2**

Direct glycosidic bond cleavage reaction of pyranose form of [GalNac- $\alpha$ -1-Ser+H]<sup>+</sup> producing glycopyranosyl oxazolinium structured B<sub>1</sub> ion and neutral serine.

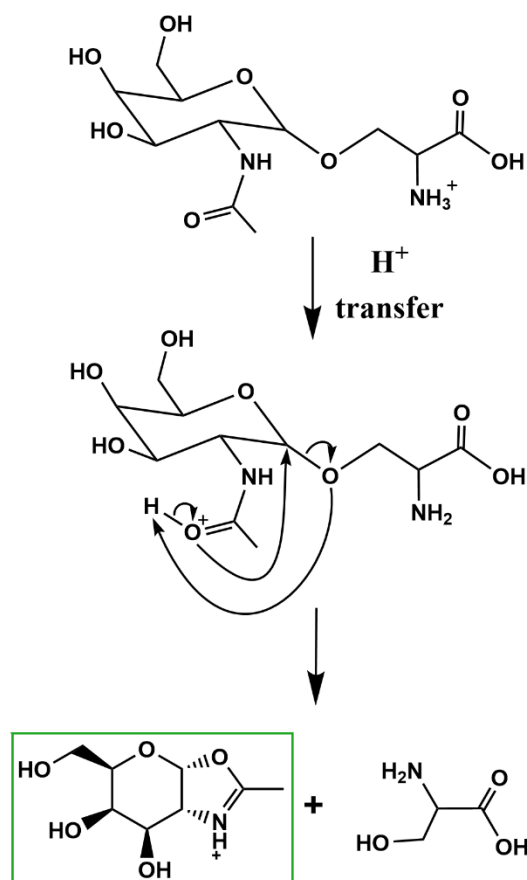

**Scheme S3**Pyranose structure to furanose Isomerization reaction for  $[\text{GlcNac-}\beta\text{-1-Ser+H}]^+$ .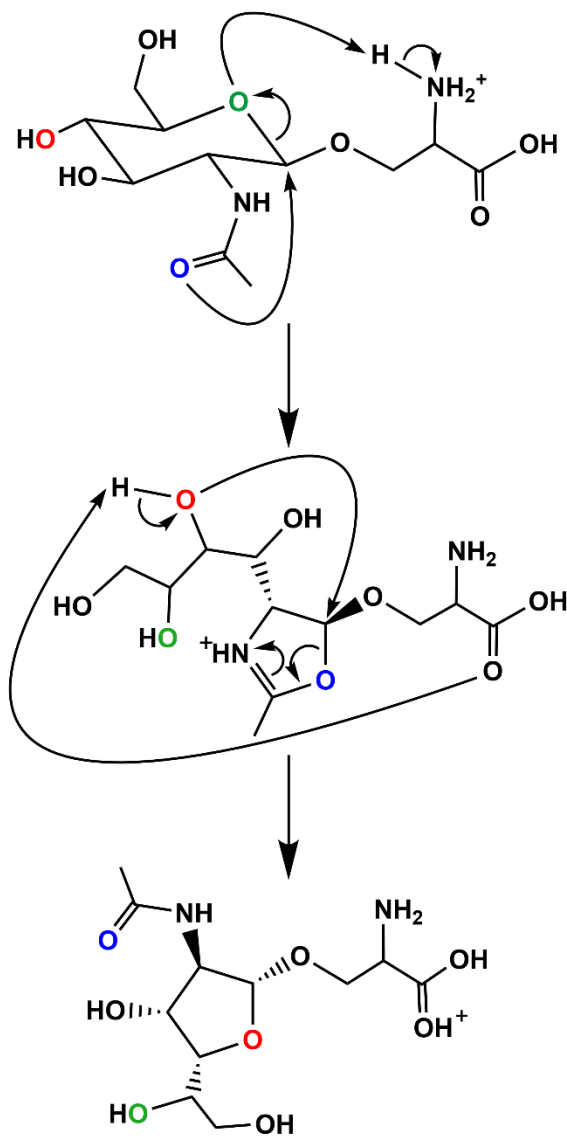

**Scheme S4**Pyranose structure to furanose Isomerization reaction for  $[\text{GalNac-}\alpha\text{-1-Ser+H}]^+$ .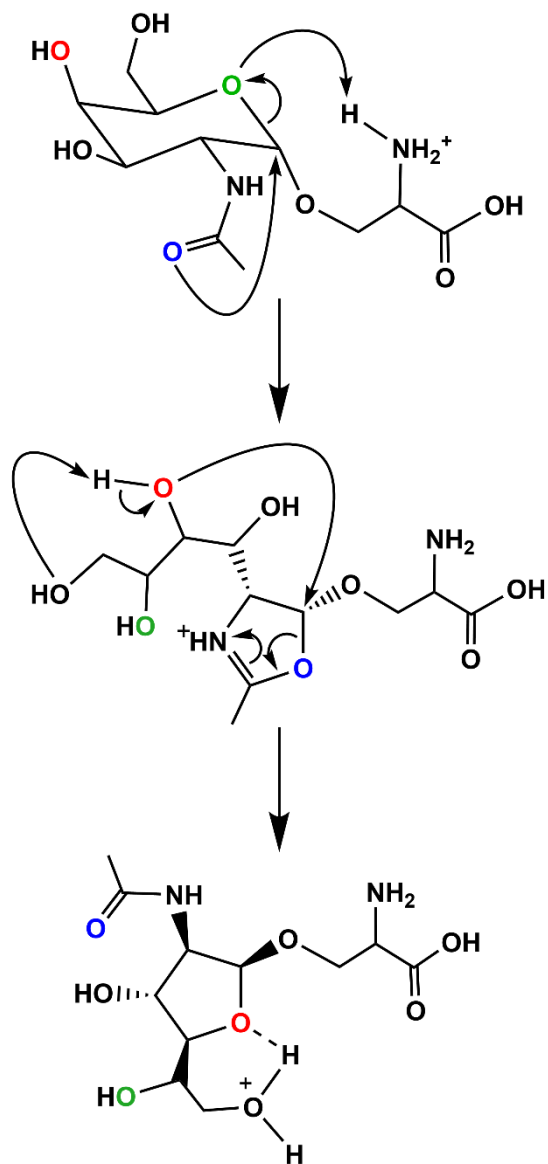

**Scheme S5**

Glycosidic bond dissociation of [GlcNac- $\beta$ -1-Ser+H]<sup>+</sup> after the Pyranose-furanose isomerization.

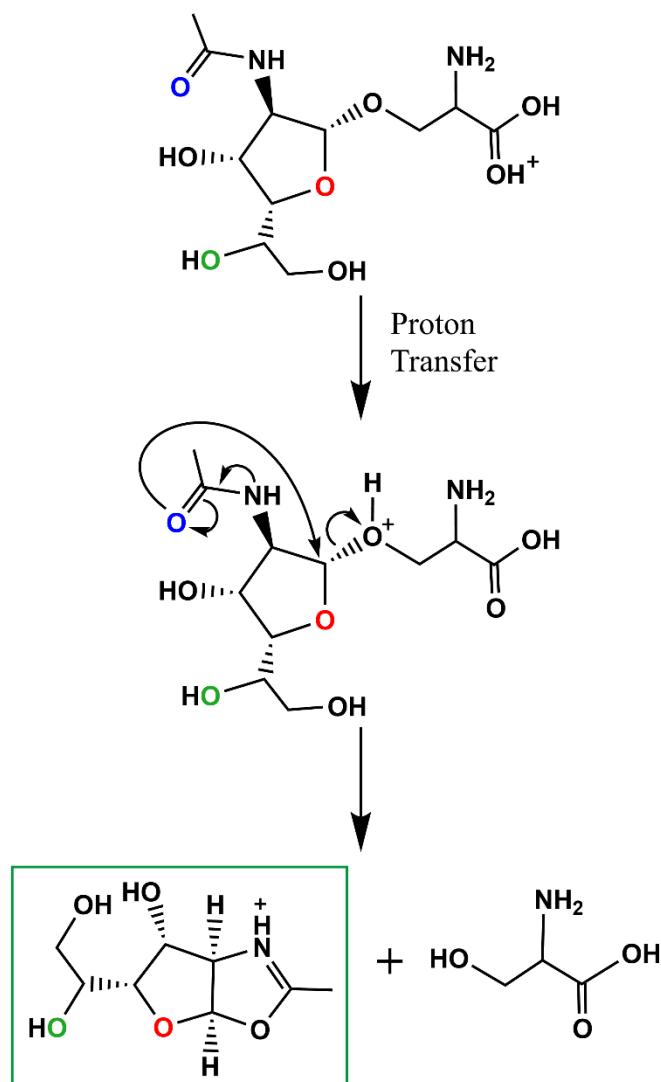



**Scheme S6**

Glycosidic bond dissociation of [GalNac- $\alpha$ -1-Ser+H]<sup>+</sup> after the Pyranose-furanose isomerization.

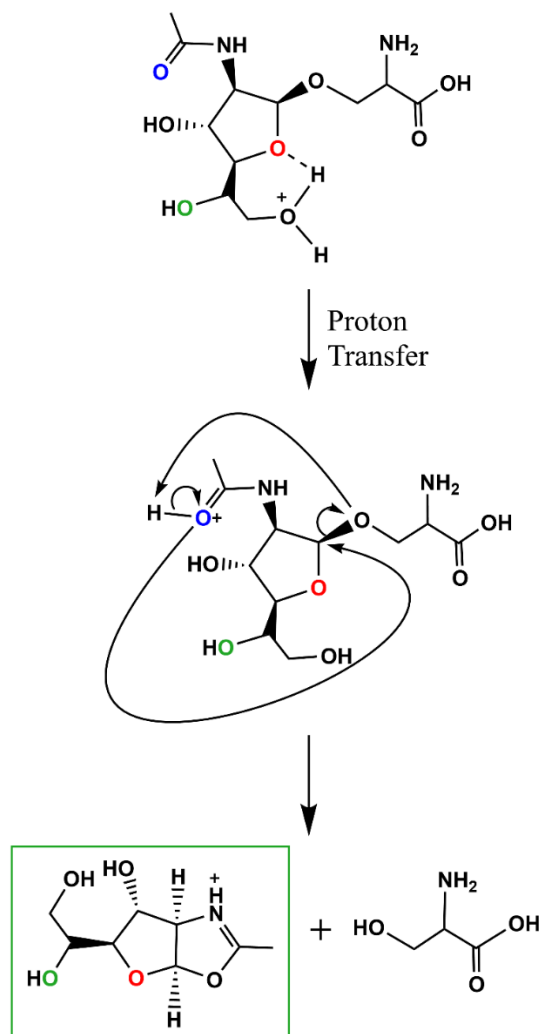

**Table S1**

Relative Energies of the Minima, Transition Structures, and Separated Products of [GlcNac- $\beta$ -1-Asn+H]<sup>+</sup>, Calculated at the B3LYP/6-31+G(d,p) Level of Theory. GM is the Global Minimum of Potential Energy Surface of [GlcNac- $\beta$ -1-Asn+H]<sup>+</sup>.

| Name                                                                  | $E_{el}/H$   | $E_{el+ZPE}/H$ | $\Delta E_{el+ZPE,OK}/$<br>$\text{kJ mol}^{-1}$ | $\Delta H_{298}/$<br>$\text{kJ mol}^{-1}$ | $\Delta G_{298}/$<br>$\text{kJ mol}^{-1}$ | $\Delta S_{298}/$ J<br>$\text{mol}^{-1}$ |
|-----------------------------------------------------------------------|--------------|----------------|-------------------------------------------------|-------------------------------------------|-------------------------------------------|------------------------------------------|
| GM                                                                    | 0            | 0              | 0                                               | 0                                         | 0                                         | 0                                        |
| <b>Direct glycosidic bond cleavage reaction (pyranose form)</b>       |              |                |                                                 |                                           |                                           |                                          |
| Glycosidic bond cleavage TS (pyranose form)                           | -1236.423538 | -1236.053009   | 149.9                                           | 149.3                                     | 148.2                                     | 3.7                                      |
| Form pyranose oxazolinium double ring TS                              | -1236.433832 | -1236.06481    | 118.9                                           | 120.6                                     | 106.1                                     | 48.9                                     |
| Products: B <sub>1</sub> (charged) + Asn                              | -1236.439628 | -1236.070006   | 105.2                                           | 105.6                                     | 50.1                                      | 185.9                                    |
| Products: B <sub>1</sub> (double ring neutral) + [Asn+H] <sup>+</sup> | -1236.392259 | -1236.022854   | 229.0                                           | 228.5                                     | 174.8                                     | 180.4                                    |
| Products: B <sub>1</sub> (double bond neutral) + [Asn+H] <sup>+</sup> | -1236.395925 | -1236.027955   | 215.7                                           | 217.9                                     | 157.1                                     | 204.1                                    |
| <b>Pyranose-Furanose isomerized glycosidic bond cleavage pathway</b>  |              |                |                                                 |                                           |                                           |                                          |
| Pyranose-Furanose isomerization Step1 TS                              | -1236.430097 | -1236.060155   | 131.1                                           | 132.4                                     | 128.2                                     | 14                                       |
| Pyranose-Furanose isomerization Step2 TS                              | -1236.433743 | -1236.06222    | 125.7                                           | 124.7                                     | 127.5                                     | -9.5                                     |
| Pyranose-Furanose isomerization Step3 TS                              | -1236.429947 | -1236.06135    | 128                                             | 125.6                                     | 130.6                                     | -16.8                                    |
| Glycosidic bond cleavage TS (furanose form)                           | -1236.437078 | -1236.06638    | 114.8                                           | 115                                       | 112.4                                     | 8.9                                      |
| Products: B <sub>1</sub> (charged) + Asn(neutral)                     | -1236.442415 | -1236.072682   | 98.2                                            | 98.4                                      | 40.5                                      | 193.9                                    |
| Products: B <sub>1</sub> (double ring neutral) + [Asn+H] <sup>+</sup> | -1236.399144 | -1236.029788   | 210.8                                           | 210.2                                     | 156.5                                     | 180                                      |
| Products: B <sub>1</sub> (double bond neutral) + [Asn+H] <sup>+</sup> | -1236.397629 | -1236.030497   | 209                                             | 212.3                                     | 148                                       | 215.3                                    |
| <b>204 (furanose oxazolinium B<sub>1</sub>) producing 126 TS</b>      |              |                |                                                 |                                           |                                           |                                          |
| Proton extraction TS (extract H from C2)                              | -1236.3591   | -1235.99794    | 294.5                                           | 296.9                                     | 233.3                                     | 213.4                                    |
| H <sub>2</sub> O loss TS                                              | -1236.411049 | -1236.045567   | 169.4                                           | 171.9                                     | 108.5                                     | 212.7                                    |
| Generate 126 TS                                                       | -1236.395226 | -1236.036412   | 193.4                                           | 203.4                                     | 117.7                                     | 287.2                                    |
| Products                                                              | -1236.412012 | -1236.056868   | 139.7                                           | 150.3                                     | -15.8                                     | 556.9                                    |
| <b>204(pyranose oxazolinium B<sub>1</sub>) -H<sub>2</sub>O TS</b>     |              |                |                                                 |                                           |                                           |                                          |
| Proton extraction TS                                                  | -1236.359382 | -1235.997975   | 294.4                                           | 296.7                                     | 234.2                                     | 209.7                                    |
| H <sub>2</sub> O loss TS                                              | -1236.402981 | -1236.037805   | 189.8                                           | 192.5                                     | 128.5                                     | 214.2                                    |
| Products                                                              | -1236.402493 | -1236.040732   | 182.1                                           | 189.3                                     | 82.6                                      | 357.8                                    |

**Table S2**

*Relative Energies of the Minima, Transition Structures, and Separated Products of [GlcNac- $\beta$ -1-Asn+H]<sup>+</sup>, Calculated at the M06-2X/6-31+G(d,p) Level of Theory. GM is the Global Minimum of Potential Energy Surface of [GlcNac- $\beta$ -1-Asn+H]<sup>+</sup>.*

| Name                                                                  | $E_e/H$      | $E_{e+ZPE}/H$ | $\Delta E_{e+ZPE,OK}/$<br>$\text{kJ mol}^{-1}$ | $\Delta H_{298}/$<br>$\text{kJ mol}^{-1}$ | $\Delta G_{298}/$<br>$\text{kJ mol}^{-1}$ | $\Delta S_{298}/$<br>$\text{J mol}^{-1}$ |
|-----------------------------------------------------------------------|--------------|---------------|------------------------------------------------|-------------------------------------------|-------------------------------------------|------------------------------------------|
| GM                                                                    | 0            | 0             | 0                                              | 0                                         | 0                                         | 0                                        |
| <b>Direct glycosidic bond cleavage reaction (pyranose form)</b>       |              |               |                                                |                                           |                                           |                                          |
| Glycosidic bond cleavage TS (pyranose form)                           | -1235.918343 | -1235.542859  | 176.2                                          | 177.5                                     | 164.2                                     | 44.7                                     |
| Form pyranose oxazolinium double ring TS                              | -1235.9258   | -1235.550316  | 156.6                                          | 158.0                                     | 152.5                                     | 18.5                                     |
| Products: B <sub>1</sub> (charged) + Asn                              | -1235.932328 | -1235.55663   | 140.0                                          | 140.5                                     | 83.9                                      | 189.8                                    |
| Products: B <sub>1</sub> (double ring neutral) + [Asn+H] <sup>+</sup> | -1235.888498 | -1235.512944  | 254.7                                          | 254.9                                     | 199                                       | 187.6                                    |
| Products: B <sub>1</sub> (double bond neutral) + [Asn+H] <sup>+</sup> | -1235.881913 | -1235.508235  | 267.1                                          | 270.6                                     | 206.2                                     | 216.2                                    |
| <b>Pyranose-Furanose isomerized glycosidic bond cleavage pathway</b>  |              |               |                                                |                                           |                                           |                                          |
| Pyranose-Furanose isomerization Step1 TS                              | -1235.929959 | -1235.553753  | 147.6                                          | 148.5                                     | 146.7                                     | 6.3                                      |
| Pyranose-Furanose isomerization Step2 TS                              | -1235.930349 | -1235.554473  | 145.7                                          | 144.7                                     | 146.1                                     | -4.8                                     |
| Pyranose-Furanose isomerization Step3 TS                              | -1235.936876 | -1235.563636  | 121.6                                          | 117.8                                     | 126.7                                     | -29.8                                    |
| Glycosidic bond cleavage TS (furanose form)                           | -1235.937561 | -1235.561231  | 127.9                                          | 128.6                                     | 127.2                                     | 4.8                                      |
| Products: B <sub>1</sub> (charged) + Asn                              | -1235.931297 | -1235.555624  | 142.7                                          | 143.2                                     | 83.1                                      | 201.5                                    |
| Products: B <sub>1</sub> (double ring neutral) + [Asn+H] <sup>+</sup> | -1235.892815 | -1235.517269  | 243.4                                          | 243.6                                     | 186.4                                     | 192                                      |
| Products: B <sub>1</sub> (double bond neutral) + [Asn+H] <sup>+</sup> | -1235.883687 | -1235.509505  | 263.7                                          | 265.9                                     | 205.0                                     | 204.1                                    |
| <b>204 (furanose oxazolinium B<sub>1</sub>) producing 126 TS</b>      |              |               |                                                |                                           |                                           |                                          |
| Proton extraction TS (extract H from C2)                              | -1235.84111  | -1235.473912  | 357.2                                          | 360                                       | 294.8                                     | 218.9                                    |
| H <sub>2</sub> O loss TS                                              | -1235.886423 | -1235.516096  | 246.4                                          | 250.9                                     | 181                                       | 234.4                                    |
| Generate 126 TS                                                       | -1235.880534 | -1235.513875  | 252.3                                          | 257.9                                     | 185.4                                     | 242.9                                    |
| Products                                                              | -1235.865041 | -1235.504558  | 276.7                                          | 288.3                                     | 117.2                                     | 574                                      |
| <b>204 (pyranose oxazolinium B<sub>1</sub>) -H<sub>2</sub>O TS</b>    |              |               |                                                |                                           |                                           |                                          |
| Proton extraction TS                                                  | -1235.838679 | -1235.469076  | 369.9                                          | 369.5                                     | 314.1                                     | 185.7                                    |
| H <sub>2</sub> O loss TS                                              | -1235.840096 | -1235.468012  | 372.7                                          | 373.4                                     | 315                                       | 195.8                                    |
| Products                                                              | -1235.878935 | -1235.511119  | 259.5                                          | 267.2                                     | 157.5                                     | 367.8                                    |

**Table S3**

*Relative Energies of the Minima, Transition Structures, and Separated Products of [GlcNac- $\beta$ -1-Ser+H]<sup>+</sup>, Calculated at the B3LYP/6-31+G(d,p) Level of Theory. GM is the Global Minimum of Potential Energy Surface of [GlcNac- $\beta$ -1-Ser+H]<sup>+</sup>.*

| Name                                                                  | $E_{el}/H$   | $E_{el+ZPE}/H$ | $\Delta E_{el+ZPE,0K}/$<br>kJ mol <sup>-1</sup> | $\Delta H_{298}/$<br>kJ mol <sup>-1</sup> | $\Delta G_{298}/$<br>kJ mol <sup>-1</sup> | $\Delta S_{298}/$<br>J mol <sup>-1</sup> |
|-----------------------------------------------------------------------|--------------|----------------|-------------------------------------------------|-------------------------------------------|-------------------------------------------|------------------------------------------|
| GM                                                                    | 0            | 0              | 0                                               | 0                                         | 0                                         | 0                                        |
| <b>Direct glycosidic bond cleavage reaction (pyranose form)</b>       |              |                |                                                 |                                           |                                           |                                          |
| Glycosidic bond cleavage TS (pyranose form)                           | -1142.919371 | -1142.571968   | 166.2                                           | 167.9                                     | 161.6                                     | 21.1                                     |
| Products: B <sub>1</sub> (charged)+Ser                                | -1142.947513 | -1142.600174   | 92.1                                            | 92.9                                      | 40.0                                      | 177.4                                    |
| Products: B <sub>1</sub> (double ring neutral) + [Ser+H] <sup>+</sup> | -1142.926706 | -1142.577819   | 150.8                                           | 150.4                                     | 99.4                                      | 170.0                                    |
| Products: B <sub>1</sub> (double bond neutral) + [Ser+H] <sup>+</sup> | -1142.930372 | -1142.58292    | 137.4                                           | 139.8                                     | 81.7                                      | 194.8                                    |
| <b>Pyranose-Furanose isomerized glycosidic bond cleavage pathway</b>  |              |                |                                                 |                                           |                                           |                                          |
| Pyranose-Furanose isomerization Step1                                 | -1142.949846 | -1142.601493   | 88.7                                            | 88.3                                      | 89.4                                      | -3.7                                     |
| Pyranose-Furanose isomerization Step2                                 | -1142.940145 | -1142.591302   | 115.4                                           | 115.2                                     | 117.3                                     | -6.8                                     |
| Glycosidic bond cleavage TS (furanose form)                           | -1142.938973 | -1142.591919   | 113.8                                           | 116                                       | 108.4                                     | 25.3                                     |
| Products: B <sub>1</sub> (charged)+Ser                                | -1142.950300 | -1142.60285    | 85.1                                            | 85.7                                      | 30.4                                      | 185.5                                    |
| Products: B <sub>1</sub> (double ring neutral) + [Ser+H] <sup>+</sup> | -1142.933591 | -1142.584753   | 132.6                                           | 132.1                                     | 81.2                                      | 170.7                                    |
| Products: B <sub>1</sub> (double bond neutral) + [Ser+H] <sup>+</sup> | -1142.932076 | -1142.585462   | 130.7                                           | 134.1                                     | 72.7                                      | 206.0                                    |
| <b>204 (furanose oxazolinium B<sub>1</sub>) producing 126 TS</b>      |              |                |                                                 |                                           |                                           |                                          |
| Proton extraction TS (extract H from C2)                              | -1142.866985 | -1142.528108   | 281.3                                           | 284.3                                     | 223.1                                     | 205.0                                    |
| H <sub>2</sub> O loss TS                                              | -1142.918933 | -1142.575735   | 156.3                                           | 159.2                                     | 98.3                                      | 204.2                                    |
| Generate 126 TS                                                       | -1142.903111 | -1142.56658    | 180.3                                           | 190.7                                     | 107.6                                     | 278.8                                    |
| Products                                                              | -1142.919896 | -1142.587036   | 126.6                                           | 137.6                                     | -25.9                                     | 548.4                                    |
| <b>204 (pyranose oxazolinium B<sub>1</sub>) -H<sub>2</sub>O TS</b>    |              |                |                                                 |                                           |                                           |                                          |
| Proton extraction                                                     | -1142.867267 | -1142.528143   | 281.2                                           | 284.0                                     | 224.0                                     | 201.0                                    |
| H <sub>2</sub> O loss                                                 | -1142.910866 | -1142.567973   | 176.7                                           | 179.8                                     | 118.3                                     | 206.3                                    |
| Products                                                              | -1142.910377 | -1142.5709     | 169.0                                           | 176.6                                     | 72.5                                      | 349.4                                    |

**Table S4**

*Relative Energies of the Minima, Transition Structures, and Separated Products of [GlcNac- $\beta$ -1-Ser+H]<sup>+</sup>, Calculated at the M062X/6-31+G(d,p) Level of Theory. GM is the Global Minimum of Potential Energy Surface of [GlcNac- $\beta$ -1-Ser+H]<sup>+</sup>.*

| Name                                                                  | $E_e/H$      | $E_{e+ZPE}/H$ | $\Delta E_{e+ZPE,0K}/$<br>kJ mol <sup>-1</sup> | $\Delta H_{298}/$<br>kJ mol <sup>-1</sup> | $\Delta G_{298}/$<br>kJ mol <sup>-1</sup> | $\Delta S_{298}/$<br>J mol <sup>-1</sup> |
|-----------------------------------------------------------------------|--------------|---------------|------------------------------------------------|-------------------------------------------|-------------------------------------------|------------------------------------------|
| GM                                                                    | 0            | 0             | 0                                              | 0                                         | 0                                         | 0                                        |
| <b>Direct glycosidic bond cleavage reaction (pyranose form)</b>       |              |               |                                                |                                           |                                           |                                          |
| Glycosidic bond cleavage TS (pyranose form)                           | -1142.456763 | -1142.102904  | 190.0                                          | 191.3                                     | 181.2                                     | 33.7                                     |
| Products: B <sub>1</sub> (charged)+ Ser                               | -1142.478651 | -1142.125735  | 130.1                                          | 131.5                                     | 70.5                                      | 204.6                                    |
| Products: B <sub>1</sub> (double ring neutral) + [Ser+H] <sup>+</sup> | -1142.461386 | -1142.10673   | 180.0                                          | 180.2                                     | 121.3                                     | 197.4                                    |
| Products: B <sub>1</sub> (double bond neutral) + [Ser+H] <sup>+</sup> | -1142.454800 | -1142.102021  | 192.3                                          | 195.9                                     | 128.5                                     | 226.0                                    |
| <b>Pyranose-Furanose isomerized glycosidic bond cleavage pathway</b>  |              |               |                                                |                                           |                                           |                                          |
| Pyranose-Furanose isomerization Step1                                 | -1142.481824 | -1142.128481  | 122.8                                          | 123.7                                     | 114.6                                     | 30.6                                     |
| Pyranose-Furanose isomerization Step2                                 | -1142.47271  | -1142.120165  | 144.7                                          | 147.3                                     | 135.2                                     | 40.6                                     |
| Glycosidic bond cleavage TS (furanose form)                           | -1142.474462 | -1142.120805  | 143.0                                          | 144.2                                     | 137.0                                     | 24.0                                     |
| Products: B <sub>1</sub> (charged)+Ser                                | -1142.477620 | -1142.124729  | 132.7                                          | 134.2                                     | 69.7                                      | 216.2                                    |
| Products: B <sub>1</sub> (double ring neutral) + [Ser+H] <sup>+</sup> | -1142.465703 | -1142.111055  | 168.6                                          | 168.9                                     | 108.7                                     | 201.8                                    |
| Products: B <sub>1</sub> (double bond neutral) + [Ser+H] <sup>+</sup> | -1142.456574 | -1142.103291  | 189.0                                          | 191.1                                     | 127.4                                     | 213.9                                    |
| <b>204 (furanose oxazolinium B<sub>1</sub>) producing 126 TS</b>      |              |               |                                                |                                           |                                           |                                          |
| Proton extraction TS (extract H from C2)                              | -1142.387433 | -1142.043017  | 347.2                                          | 351.0                                     | 281.3                                     | 233.6                                    |
| H <sub>2</sub> O loss TS                                              | -1142.432746 | -1142.085201  | 236.5                                          | 241.8                                     | 167.5                                     | 249.1                                    |
| Generate 126 TS                                                       | -1142.426857 | -1142.08298   | 242.3                                          | 248.8                                     | 172.0                                     | 257.7                                    |
| Products                                                              | -1142.411364 | -1142.073663  | 266.8                                          | 279.3                                     | 103.7                                     | 588.7                                    |
| <b>204 (pyranose oxazolinium B<sub>1</sub>) -H<sub>2</sub>O TS</b>    |              |               |                                                |                                           |                                           |                                          |
| Proton extraction                                                     | -1142.385002 | -1142.038181  | 359.9                                          | 360.4                                     | 300.7                                     | 200.4                                    |
| H <sub>2</sub> O loss                                                 | -1142.386419 | -1142.037117  | 362.7                                          | 364.3                                     | 301.6                                     | 210.5                                    |
| Products                                                              | -1142.425258 | -1142.080224  | 249.5                                          | 258.1                                     | 144.1                                     | 382.5                                    |

**Table S5**

*Relative Energies of the Minima, Transition Structures, and Separated Products of [GalNac- $\alpha$ -1-Ser+H]<sup>+</sup>, Calculated at the B3LYP/6-31+G(d,p) Level of Theory. GM is the Global Minimum of Potential Energy Surface of [GalNac- $\alpha$ -1-Ser+H]<sup>+</sup>.*

| Name                                                                                                  | $E_e/H$      | $E_{e+ZPE}/H$ | $\Delta E_{e+ZPE,0K}/$<br>$\text{kJ mol}^{-1}$ | $\Delta H_{298}/$<br>$\text{kJ mol}^{-1}$ | $\Delta G_{298}/$<br>$\text{kJ mol}^{-1}$ | $\Delta S_{298}/$<br>$\text{J mol}^{-1}$ |
|-------------------------------------------------------------------------------------------------------|--------------|---------------|------------------------------------------------|-------------------------------------------|-------------------------------------------|------------------------------------------|
| GM                                                                                                    | 0            | 0             | 0                                              | 0                                         | 0                                         | 0                                        |
| <b>Direct glycosidic bond cleavage reaction (pyranose form)</b>                                       |              |               |                                                |                                           |                                           |                                          |
| Glycosidic bond cleavage TS (pyranose form)                                                           | -1142.92162  | -1142.573399  | 160.9                                          | 163.0                                     | 153.9                                     | 30.6                                     |
| Products: B <sub>1</sub> (charged)+Ser                                                                | -1142.941419 | -1142.593209  | 108.9                                          | 109.5                                     | 54.4                                      | 184.5                                    |
| Products: B <sub>1</sub> (double ring neutral) + [Ser+H] <sup>+</sup>                                 | -1142.927357 | -1142.577738  | 149.5                                          | 149.1                                     | 97.6                                      | 172.6                                    |
| Products: B <sub>1</sub> (double bond neutral) + [Ser+H] <sup>+</sup>                                 | -1142.939246 | -1142.590434  | 116.2                                          | 117.3                                     | 61.9                                      | 185.9                                    |
| <b>Pyranose-Furanose isomerized glycosidic bond cleavage pathway</b>                                  |              |               |                                                |                                           |                                           |                                          |
| Pyranose-Furanose isomerization Step1                                                                 | -1142.947085 | -1142.597886  | 96.7                                           | 97.1                                      | 93.5                                      | 12.3                                     |
| Pyranose-Furanose isomerization Step2                                                                 | -1142.950657 | -1142.602305  | 85.1                                           | 85.5                                      | 82.6                                      | 9.8                                      |
| Glycosidic bond cleavage TS (furanose form)                                                           | -1142.934749 | -1142.589317  | 119.2                                          | 123.4                                     | 111.7                                     | 39.2                                     |
| Products: B <sub>1</sub> (charged)+Ser                                                                | -1142.950877 | -1142.603782  | 81.2                                           | 83.1                                      | 24.7                                      | 195.8                                    |
| Products: B <sub>1</sub> (double ring neutral) + [Ser+H] <sup>+</sup>                                 | -1142.929852 | -1142.581293  | 140.2                                          | 140.7                                     | 85.5                                      | 185.1                                    |
| Products: B <sub>1</sub> (double bond neutral) + [Ser+H] <sup>+</sup>                                 | -1142.933302 | -1142.586365  | 126.9                                          | 130.6                                     | 65.4                                      | 218.6                                    |
| <b>204 (furanose oxazolinium B<sub>1</sub>) producing 126 TS</b>                                      |              |               |                                                |                                           |                                           |                                          |
| H <sub>2</sub> O loss TS (extract H from C2)                                                          | -1142.85303  | -1142.512383  | 321.1                                          | 323.0                                     | 264.7                                     | 195.5                                    |
| Generate 126 TS                                                                                       | -1142.905079 | -1142.566392  | 179.3                                          | 188.6                                     | 107.8                                     | 271.2                                    |
| Products                                                                                              | -1142.905859 | -1142.572362  | 163.7                                          | 175.6                                     | 6.1                                       | 568.4                                    |
| <b>204 (furanose oxazolinium B<sub>1</sub>) -H<sub>2</sub>O (extract H from oxazolinium nitrogen)</b> |              |               |                                                |                                           |                                           |                                          |
| Proton extraction TS                                                                                  | -1142.858511 | -1142.515147  | 313.9                                          | 313.1                                     | 261.0                                     | 174.8                                    |
| H <sub>2</sub> O loss TS                                                                              | -1142.870569 | -1142.527705  | 280.9                                          | 283.4                                     | 223.2                                     | 201.8                                    |
| Products                                                                                              | -1142.934979 | -1142.593005  | 109.5                                          | 114.8                                     | 13.4                                      | 340.0                                    |
| <b>204 (pyranose oxazolinium B<sub>1</sub>) -H<sub>2</sub>O TS</b>                                    |              |               |                                                |                                           |                                           |                                          |
| TS                                                                                                    | -1142.864257 | -1142.524136  | 290.3                                          | 293.1                                     | 230.2                                     | 211.0                                    |
| Products                                                                                              | -1142.91277  | -1142.573187  | 161.5                                          | 170.1                                     | 62.3                                      | 361.6                                    |

**Table S6**

*Relative Energies of the Minima, Transition Structures, and Separated Products of [GalNac- $\alpha$ -1-Ser+H]<sup>+</sup>, Calculated at the M062X/6-31+G(d,p) Level of Theory. GM is the Global Minimum of Potential Energy Surface of [GalNac- $\alpha$ -1-Ser+H]<sup>+</sup>.*

| Name                                                                                                  | $E_{el}/H$   | $E_{el+ZPE}/H$ | $\Delta E_{el+ZPE,OK}/$<br>kJ mol <sup>-1</sup> | $\Delta H_{298}/$<br>kJ mol <sup>-1</sup> | $\Delta G_{298}/$<br>kJ mol <sup>-1</sup> | $\Delta S_{298}/$<br>J mol <sup>-1</sup> |
|-------------------------------------------------------------------------------------------------------|--------------|----------------|-------------------------------------------------|-------------------------------------------|-------------------------------------------|------------------------------------------|
| <b>GM</b>                                                                                             | <b>0</b>     | <b>0</b>       | <b>0</b>                                        | <b>0</b>                                  | <b>0</b>                                  | <b>0</b>                                 |
| <b>Glycosidic bond cleavage (pyranose form)</b>                                                       |              |                |                                                 |                                           |                                           |                                          |
| Glycosidic bond cleavage TS (pyranose form)                                                           | -1142.456045 | -1142.102363   | 184.9                                           | 187.0                                     | 181.3                                     | 18.8                                     |
| Products: B <sub>1</sub> (charged) + Ser                                                              | -1142.471982 | -1142.118515   | 142.5                                           | 143.2                                     | 88.7                                      | 182.7                                    |
| Products: B <sub>1</sub> (double ring neutral) + [Ser+H] <sup>+</sup>                                 | -1142.461408 | -1142.106169   | 174.9                                           | 174.5                                     | 123.7                                     | 170.3                                    |
| Products: B <sub>1</sub> (double bond neutral) + [Ser+H] <sup>+</sup>                                 | -1142.462957 | -1142.108711   | 168.3                                           | 169.9                                     | 112.9                                     | 191.0                                    |
| <b>Pyranose-Furanose isomerized glycosidic bond cleavage pathway</b>                                  |              |                |                                                 |                                           |                                           |                                          |
| Pyranose-Furanose isomerization Step1                                                                 | -1142.480143 | -1142.125577   | 124.0                                           | 124.5                                     | 122.0                                     | 8.4                                      |
| Pyranose-Furanose isomerization Step2                                                                 | -1142.482697 | -1142.129169   | 114.5                                           | 115.5                                     | 113.0                                     | 8.1                                      |
| Glycosidic bond cleavage TS (furanose form)                                                           | -1142.466252 | -1142.115131   | 151.4                                           | 155.0                                     | 147.9                                     | 24.0                                     |
| Products: B <sub>1</sub> (charged)+Ser                                                                | -1142.480541 | -1142.127645   | 118.5                                           | 119.9                                     | 63.8                                      | 188.4                                    |
| Products: B <sub>1</sub> (double ring neutral)+ [Ser+H] <sup>+</sup>                                  | -1142.459041 | -1142.105057   | 177.8                                           | 178.7                                     | 122.7                                     | 187.8                                    |
| Products: B <sub>1</sub> (double bond neutral) + [Ser+H] <sup>+</sup>                                 | -1142.454473 | -1142.102502   | 184.6                                           | 188.6                                     | 125.0                                     | 213.3                                    |
| <b>204 (furanose oxazolinium B<sub>1</sub>) producing 126 TS</b>                                      |              |                |                                                 |                                           |                                           |                                          |
| H <sub>2</sub> O loss TS (extract H from C2)                                                          | -1142.381835 | -1142.03469    | 362.6                                           | 363.7                                     | 309.8                                     | 180.8                                    |
| Generate 126 TS                                                                                       | -1142.413148 | -1142.069156   | 272.1                                           | 281.1                                     | 203.6                                     | 259.7                                    |
| Products                                                                                              | -1142.404325 | -1142.065900   | 280.7                                           | 290.8                                     | 127.5                                     | 547.6                                    |
| <b>204 (furanose oxazolinium B<sub>1</sub>) -H<sub>2</sub>O (extract H from oxazolinium nitrogen)</b> |              |                |                                                 |                                           |                                           |                                          |
| Proton extraction TS                                                                                  | -1142.389039 | -1142.039718   | 349.4                                           | 348.1                                     | 297.8                                     | 168.7                                    |
| H <sub>2</sub> O loss TS                                                                              | -1142.395088 | -1142.046096   | 332.6                                           | 334.2                                     | 278.4                                     | 187.2                                    |
| Products                                                                                              | -1142.458009 | -1142.110569   | 163.4                                           | 168.6                                     | 69.1                                      | 333.7                                    |
| <b>204 (pyranose oxazolinium B<sub>1</sub>) -H<sub>2</sub>O TS</b>                                    |              |                |                                                 |                                           |                                           |                                          |
| TS                                                                                                    | -1142.382731 | -1142.037681   | 354.7                                           | 356.0                                     | 297.5                                     | 196.4                                    |
| Products                                                                                              | -1142.42778  | -1142.081995   | 238.4                                           | 246.1                                     | 140.7                                     | 353.6                                    |
